# Supplementary material for: Sodium oligomannate alters gut microbiota, reduces cerebral amyloidosis and reactive microglia in a sex-specific manner
Source: Springer Nature journal article supplement (doi:10.1186/s13024-023-00700-w), 2024-02-17
Supplement: MOESM1 [file Additional file 1.pdf › Additional file 1.pdf]

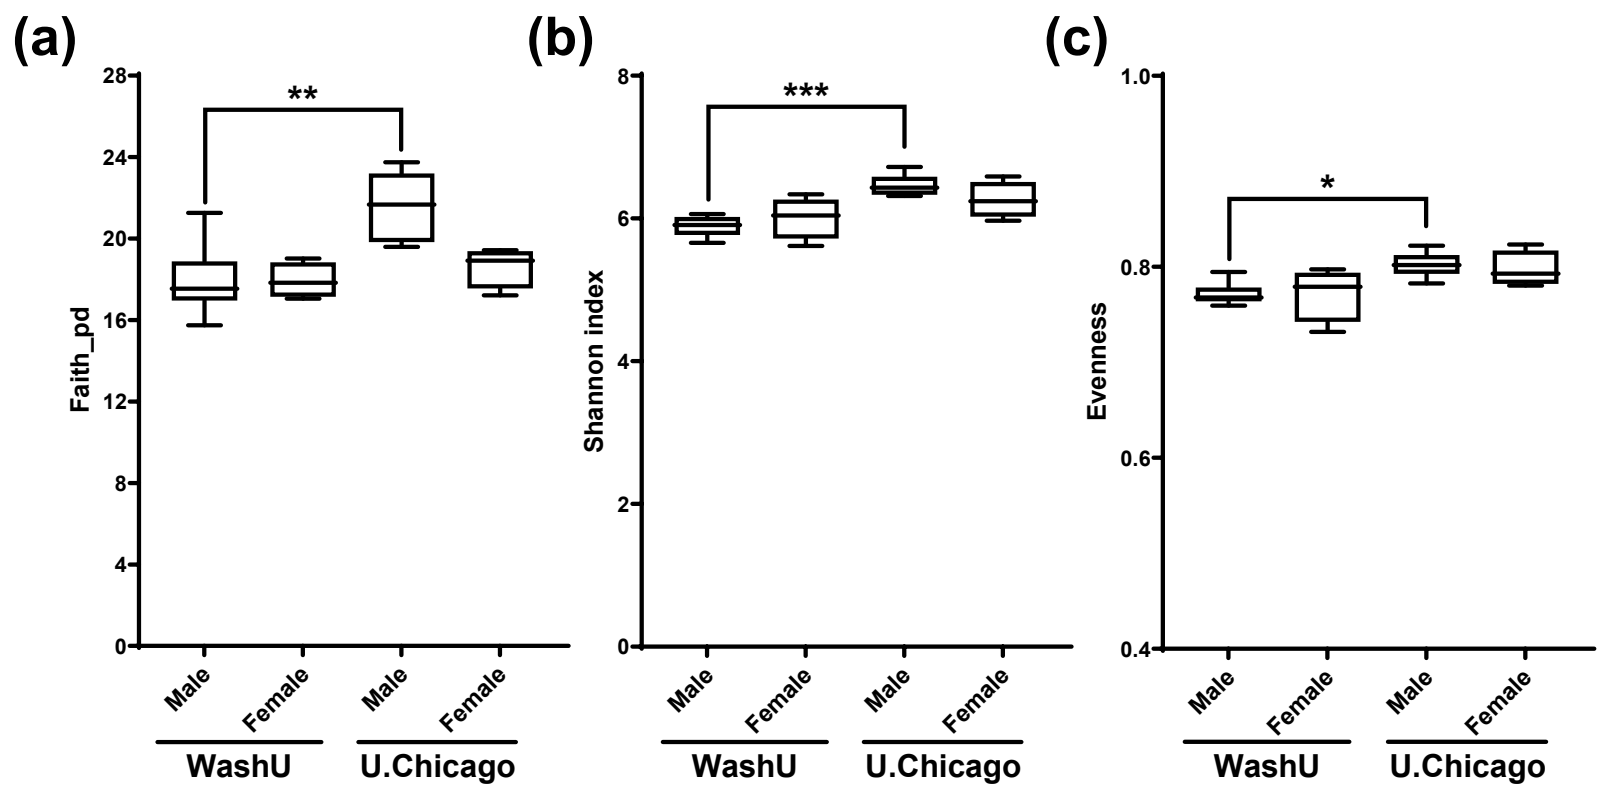

(d)

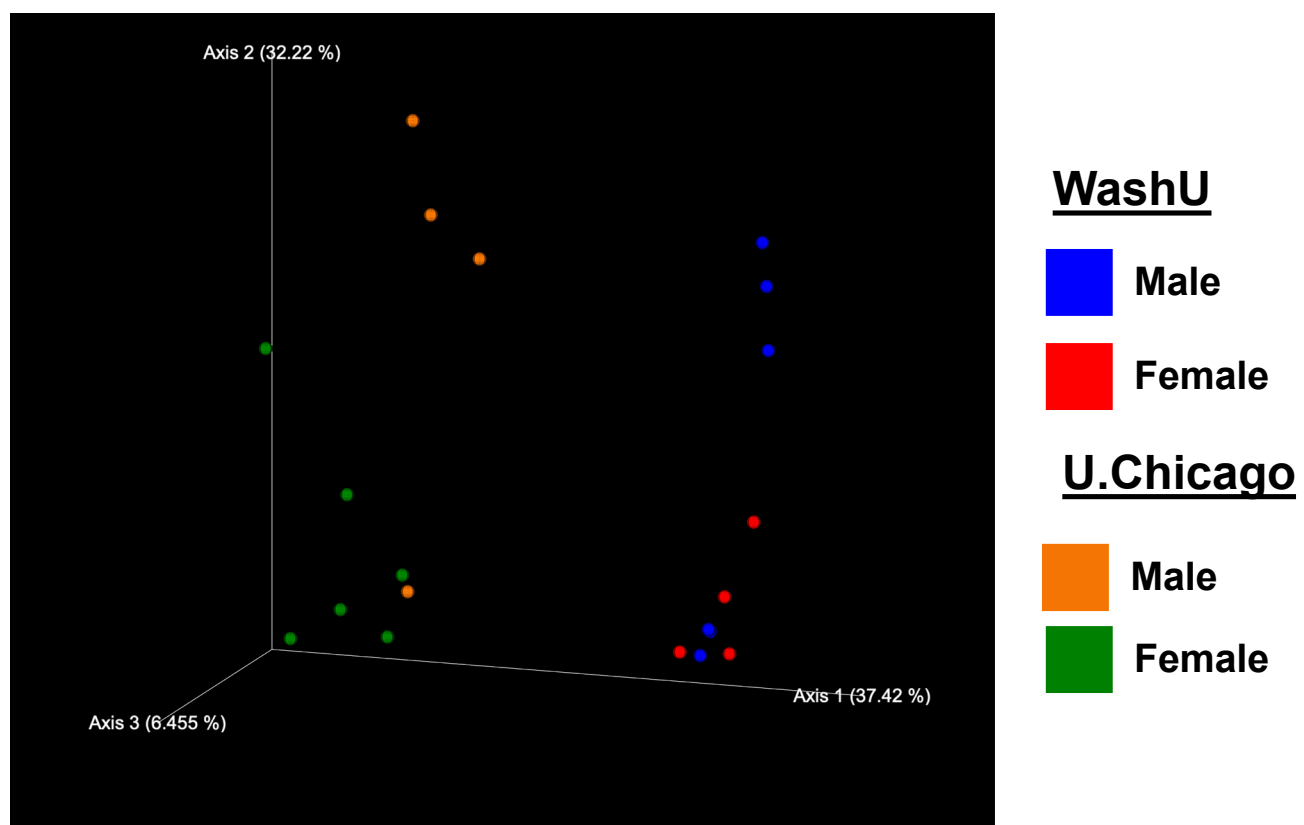

# Washington University – 5XFAD

(a)

Ctr

GV-971

Male

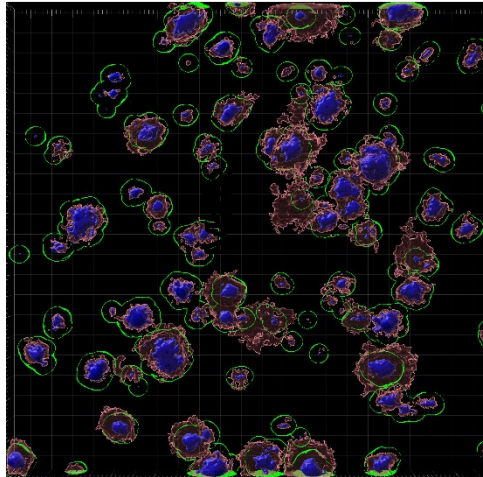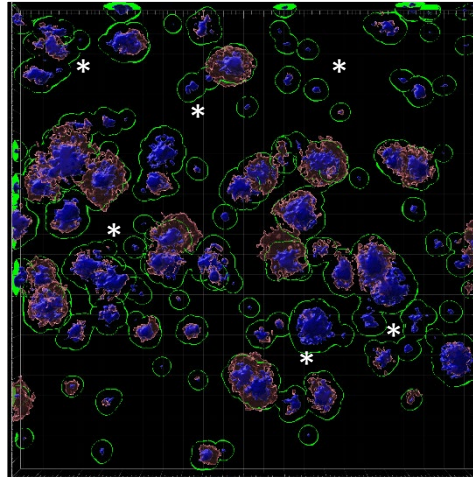

Female

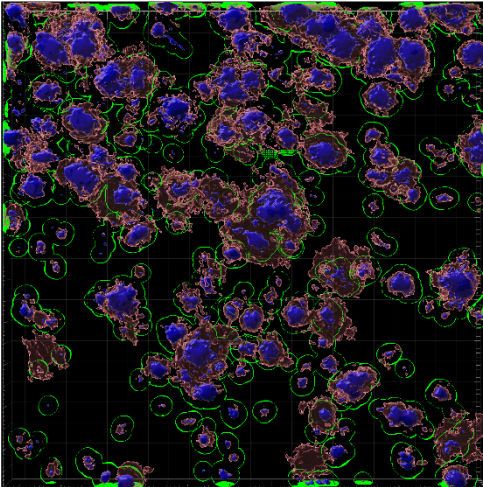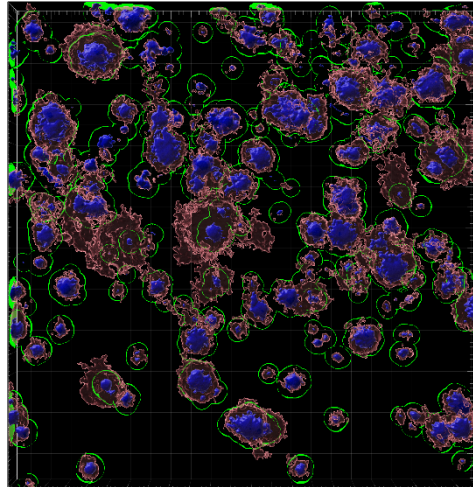

(b)

Male

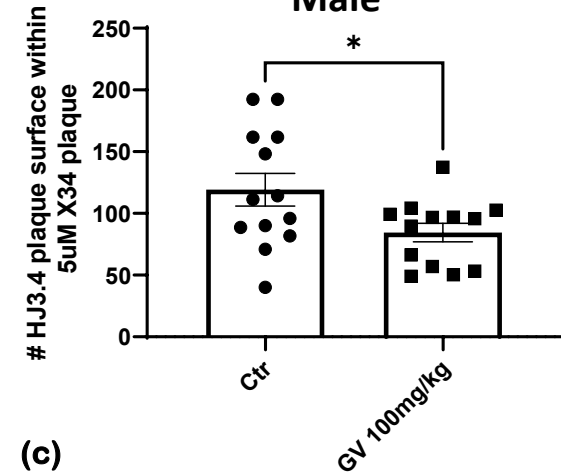

(c)

Female

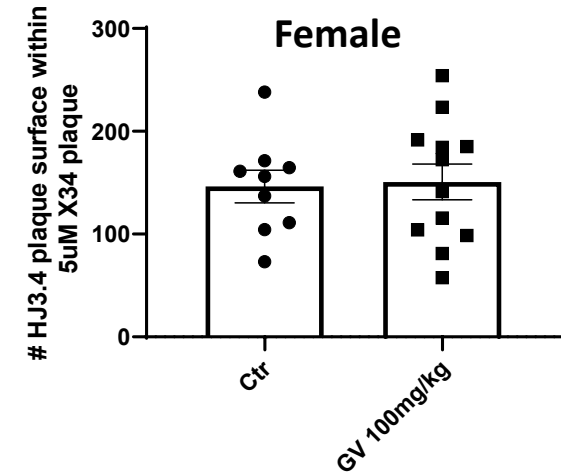

Log2FoldChange  
-4 0 4  
Not Detected

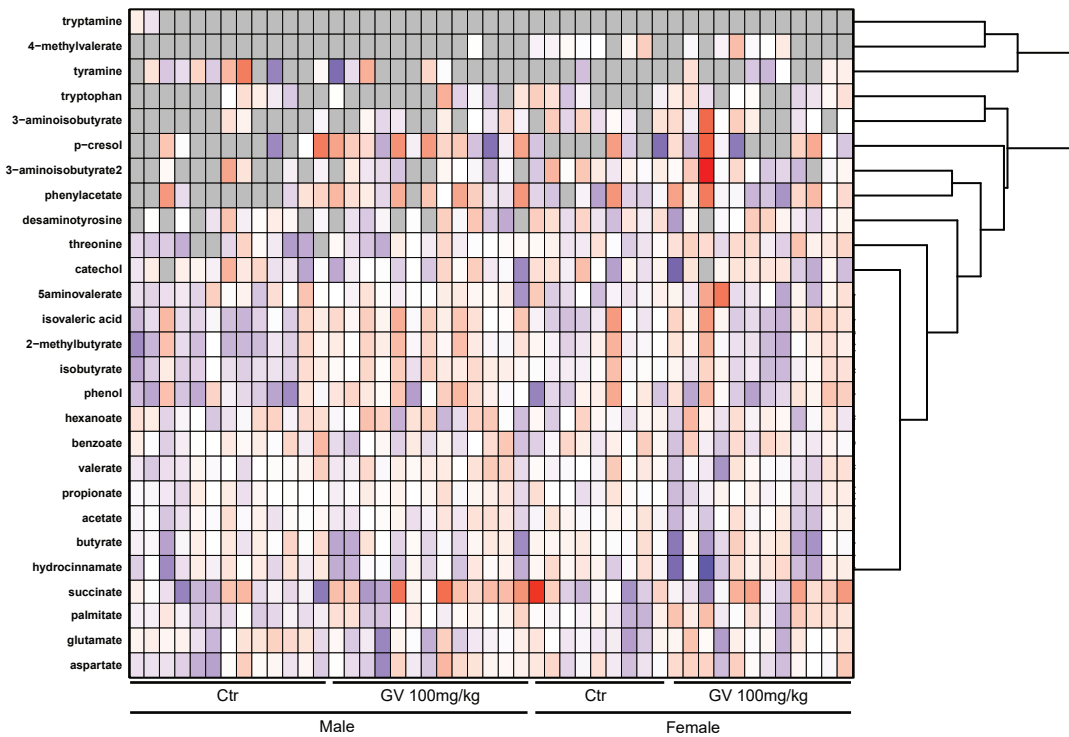

Log2FoldChange  
-2 0 2  
Not Detected

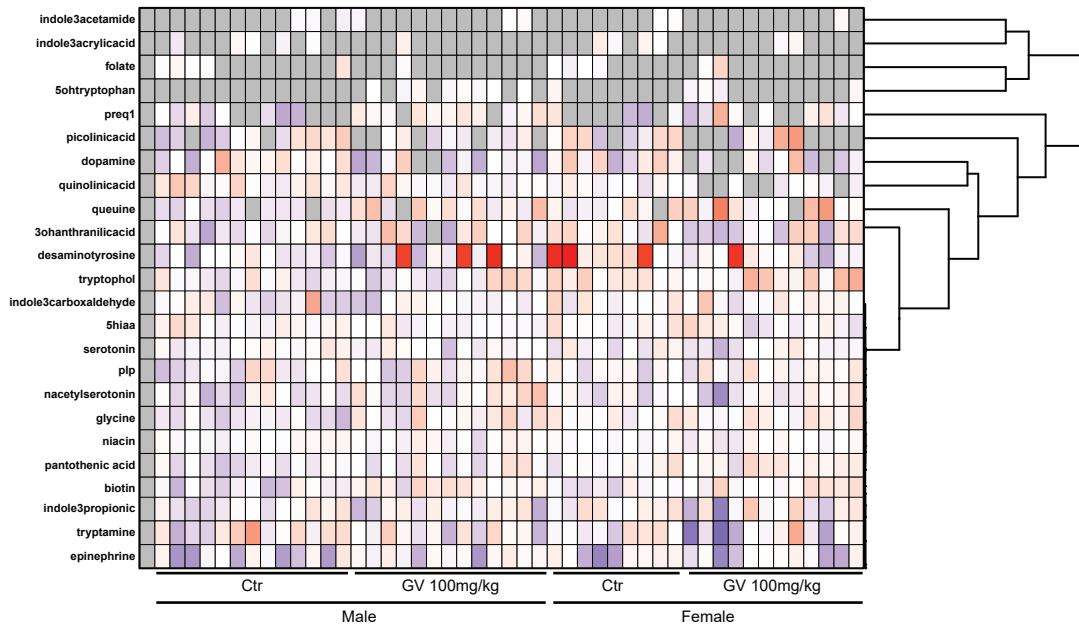



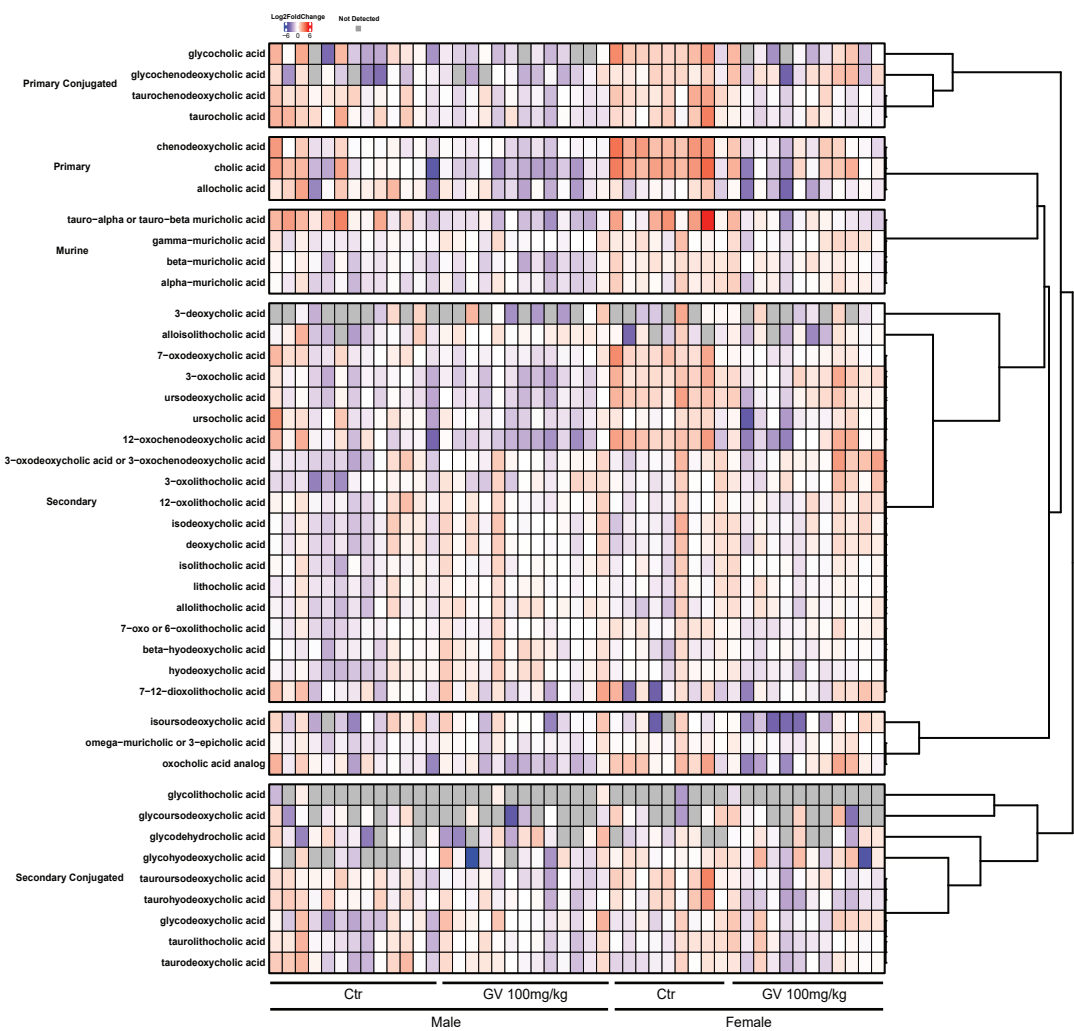

## U. Chicago- APPPS1-21

(a)

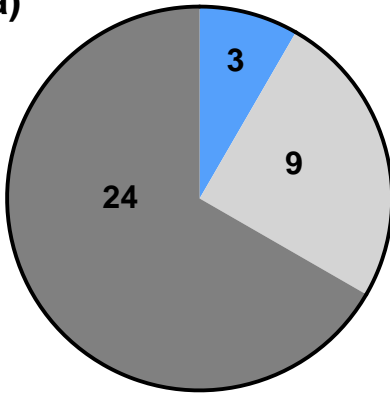

Male Ctr vs.  
160mg/kg GV-971

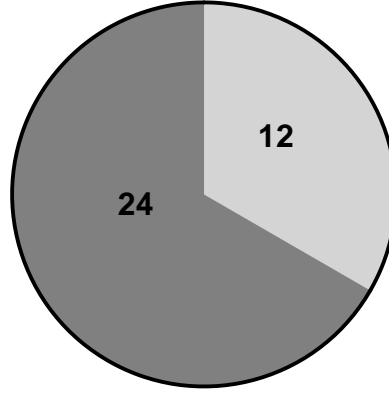

Female Ctr vs.  
160mg/kg GV-971

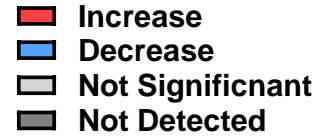

## WashU – 5XFAD

(b)

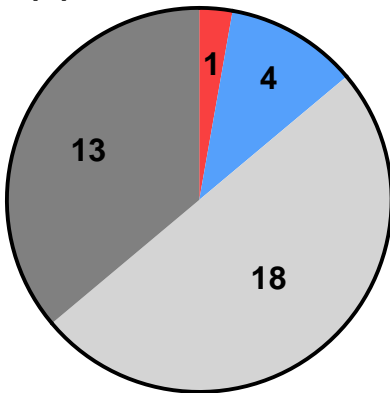

Male Ctr vs.  
100mg/kg GV-971

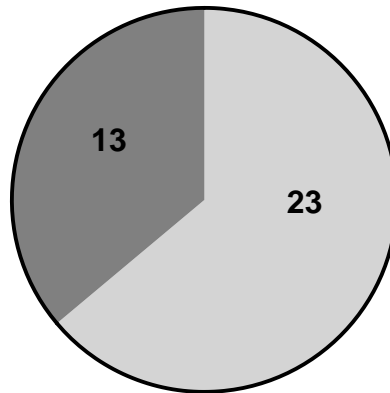

Female Ctr vs.  
100mg/kg GV-971

(c)

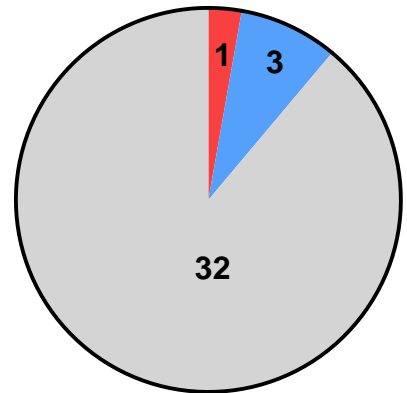

Male Ctr vs.  
100mg/kg GV-971

# U.Chicago – APPPS1-21

(a) Male

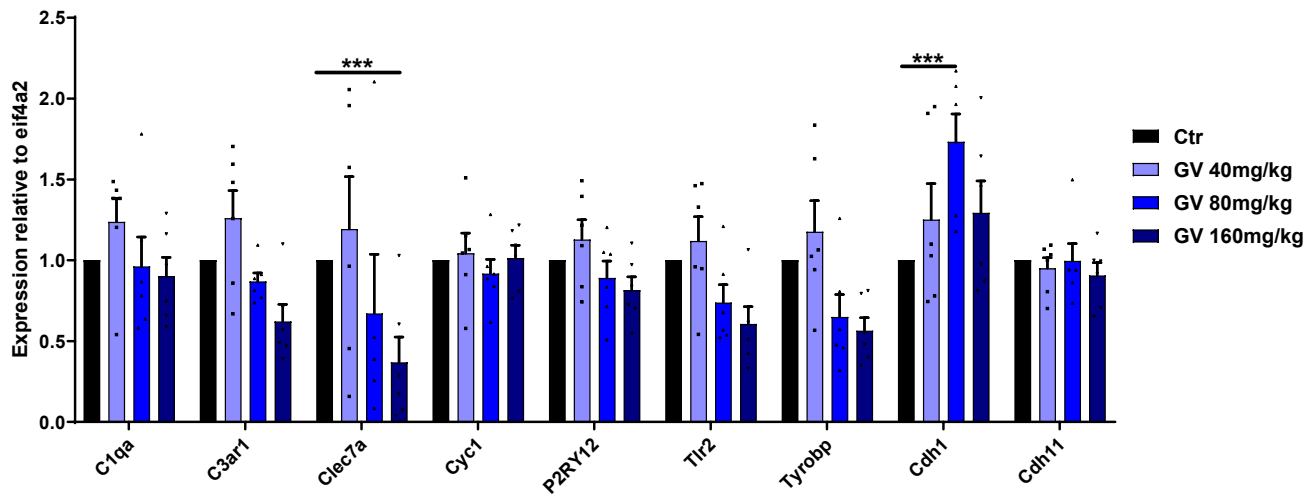

(b) Female

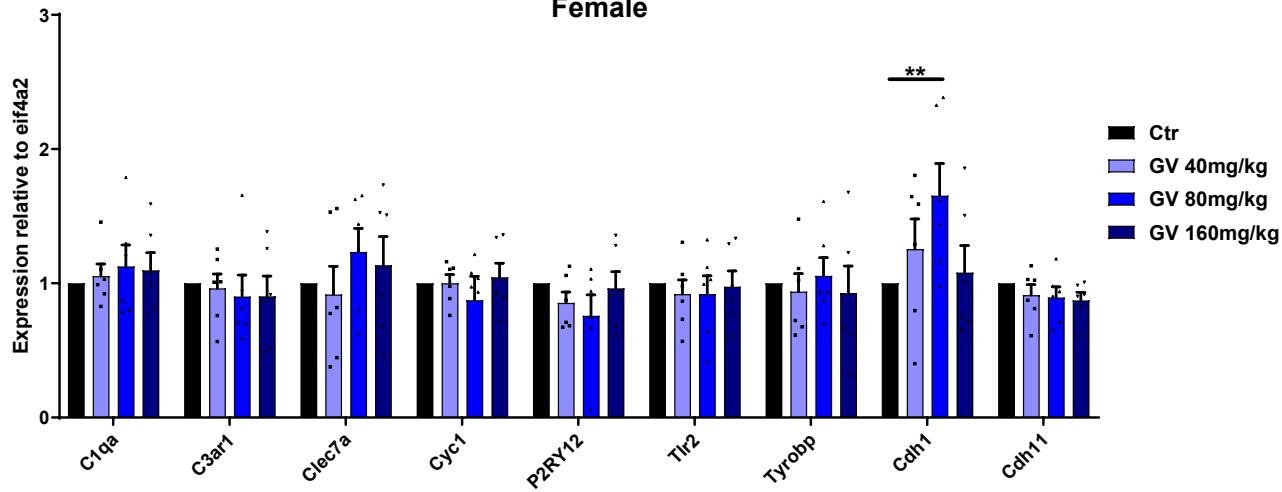

# WashU- 5XFAD

(a)  row min row max

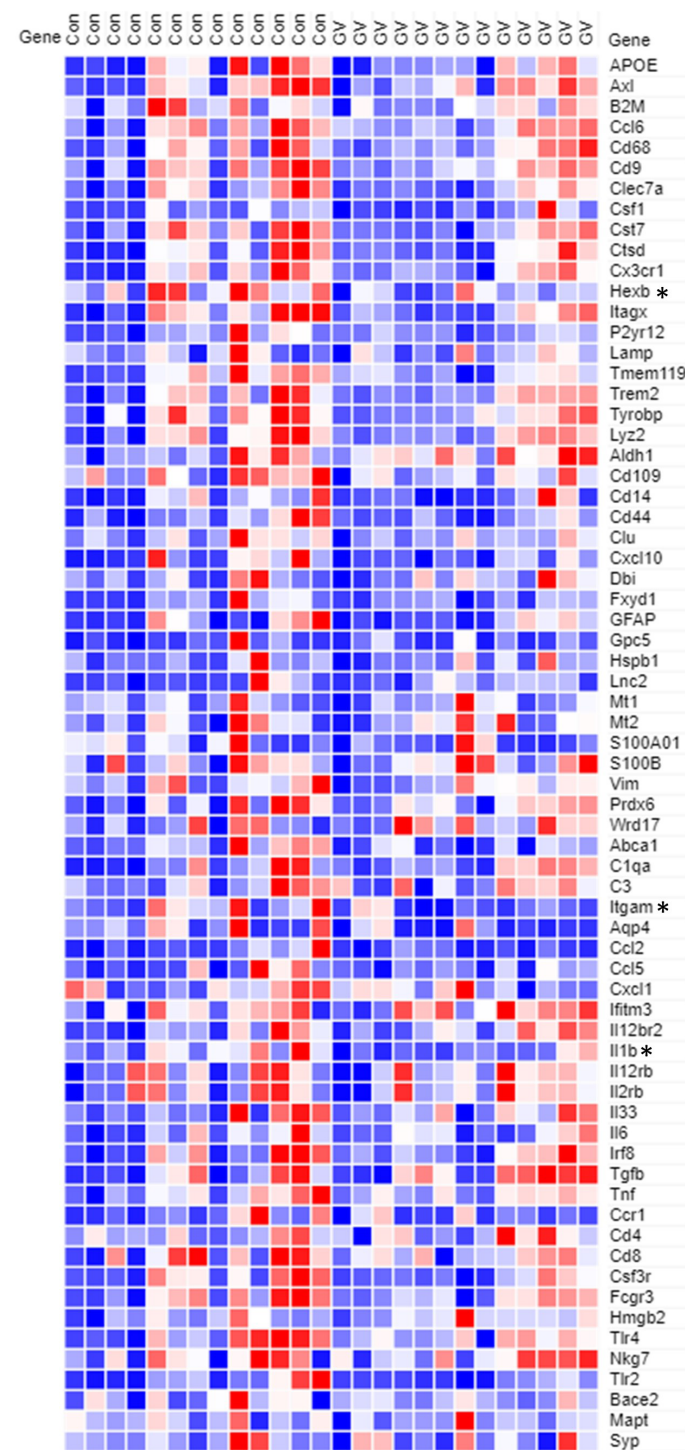

Male

(b)  row min row max

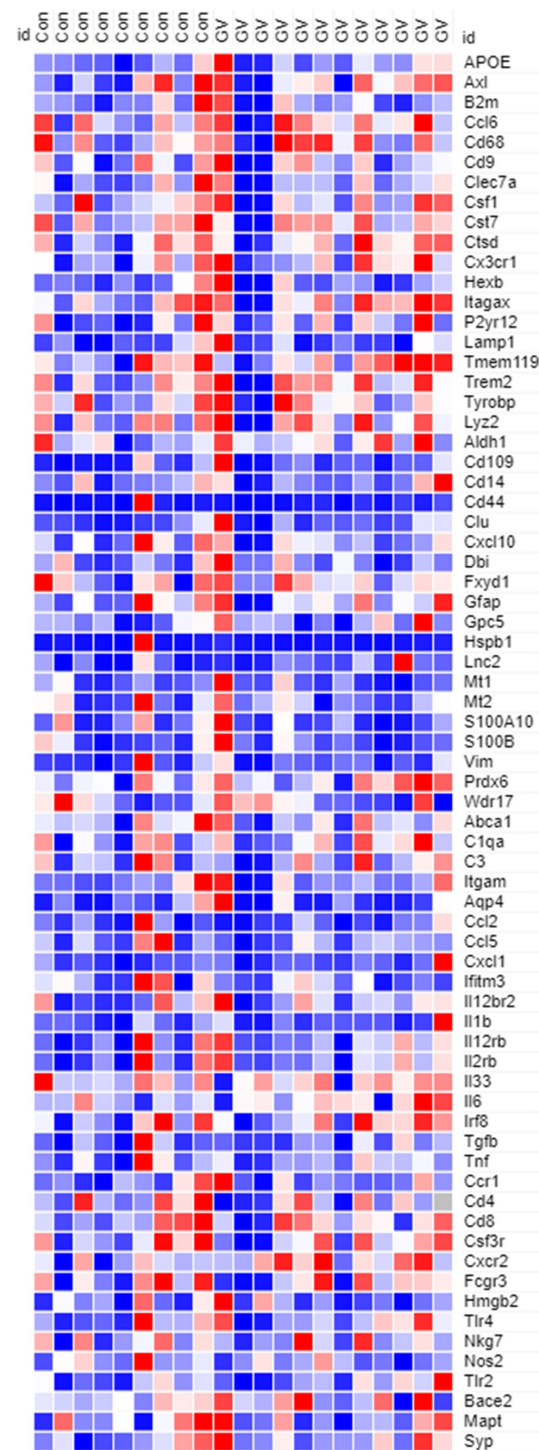

Female
